# Supplementary material for: NIR-mediated Deformation from a CNT-based Bilayer Hydrogel
Source: Preprints.org preprint supplement (doi:10.20944/preprints202403.0974.v1), 2024-03-18
Supplement: Supplementary file 1 [file supplementary]

**Supporting Information for**

NIR-mediated Deformation from a CNT-based Bilayer Hydrogel

Shijun Long1,2,3*, Chang Liu1, Han Ren1, Yali Hu1, Chao Chen4*, Yiwan Huang1,2 and Xuefeng Li1,2,3*

1 Hubei Provincial Key Laboratory of Green Materials for Light Industry, Hubei University of Technology, Wuhan, 430068, PR China

2 Hubei Longzhong Laboratory, Xiangyang, 441000, PR China

3 *New Materials and Green Manufacturing Talent Introduction and Innovation Demonstration Base, Hubei University of Technology, Wuhan, 430068, PR China*

4 *Hubei Key Laboratory of Polymer Materials, Hubei University, 430062, Wuhan, PR China*

*Corresponding author: longshijun.hp@163.com; chenchao@hubu.edu.cn; li_xf@mail.hbut.edu.cn


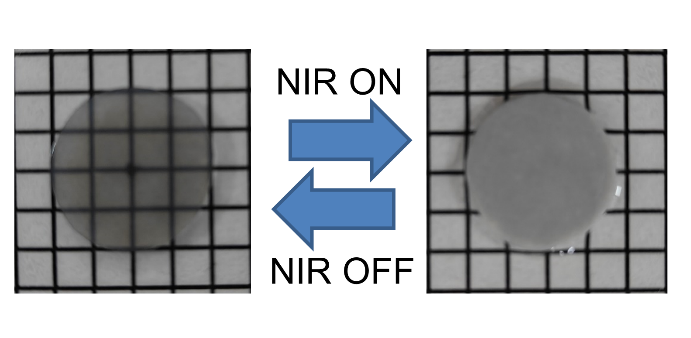


**Figure S1.** Optical photos of the phase transition behavior of PNaAMPS/P(NIPAM-co-MA)/CNTs hydrogels under near-infrared light irradiation

**Figure S2.** Transmittance curve of all hydrogels(PNaAMPS/P(NIPAM-co-MA), PNaAMPS/P(NIPAM-co-MA)/CNTs and SN: P(NIPAM-co-MA))

**Figure S3.** Cyclic reversible photothermal conversion behavior of PNaAMPS/P(NIPAM-co-MA)/CNTs hydrogels(Control group: PNaAMPS/P(NIPAM-co-MA) hydrogel)

**Figure S4.** Cyclic reversible bending behavior of bilayer hydrogel(active layer: PNaAMPS/P(NIPAM-co-MA)/CNTs, negative layer: PNaAMPS/P(NIPAM-co-MA)) under infrared light irradiation
